# Supplementary material for: The AGPase Family Proteins in Banana: Genome-Wide Identification, Phylogeny, and Expression Analyses Reveal Their Involvement in the Development, Ripening, and Abiotic/Biotic Stress Responses
Source: MDPI journal article supplement (doi:10.3390/ijms18081581), 2017-07-25
Supplement: s1 [file s1]

|         |                                                                  |
|---------|------------------------------------------------------------------|
| MaAPL1a | MSFSHSPTLPLLRQGDMVMCMNSRMVPLATVGRLPGRPI PRLVGTSRDGQTMGTRLDWQR    |
| MaAPL1b | -----MMDASSVGLKSSACLSQLKRGVLDAAES-----GFAVGSR-----IMAWKP         |
| MaAPL2a | -----MEVCSVGMKANVCFGQVKRRSVGSGESGIWGEIGGGGGGL-KIKVWET            |
| MaAPL2b | -----MEVCSVGMKANVCFGQVKRRSVGSGESGIWGEIGGGGGGL-KIKVWET            |
| MaAPL2c | -----MDVCCVGS MANACFSQVKRASVGCRESGIWGDGIGNGPK---TTKVWDS          |
| MaAPL3  | -----MIAPLMDVSSVGLKANACFSHVKRGVLGSGESGIWGDGSAGASR-----IRAWES     |
| MaAPS1  | -----MAAMGIAKL PPLNNSVHPAHRKSPTPFLASSDPRLSSSFHVSGGND--NILLLRK    |
| MaAPS2  | -----MVILRLAPSFSLVRRPTTVSMQHS---DLNTQRK-----RWRQ                 |
|         | .                                                                |
| MaAPL1a | YLRLCLRSGRGSMVGAAEKRLVVQMAIVTTDVET-----EVKFRDLDLERRNPGTVVAVI     |
| MaAPL1b | KVVRSAKNCCCWVGEFKAGAGVFAITS AVNKET-----VIQAPRFGKHKPDARSVASII     |
| MaAPL2a | KVVKGVK-RRNSLG-----AAVAVLTS DVSEET-----MVLHAPMFGYRTAEPKSVASII    |
| MaAPL2b | KVVKGVK-RRNSLG-----AAVAVLTS DVSEET-----MVLHAPMFGYRTAEPKSVASII    |
| MaAPL2c | KVAKSLK-TRSSFGRKRTGVAFSVLTS DVDQET-----MVFHAPMFGRRTADPKSVASII    |
| MaAPL3  | KVAKNVK-SGRWVGGFKAGVAFSDLTS DVNQETLINDPYVIQAPMFGKHKPDPKSVASII    |
| MaAPS1  | AAIASGR--RTASG-----ARTPVLVSPKAVSD-----SRSSQTCLDPDASRSVLGII       |
| MaAPS2  | PHVFLDT-----MDTTLCQSHKDS-----PLFPPLNQSVLAI I                     |
|         | . * . *                                                          |
| MaAPL1a | LGGGAGTRLFPLTKRRAKPAVPIGGAYRLIDVPM S NCINS GINKVYILTQFNSASLN RHL |
| MaAPL1b | LGGGAGQLFPLTSTRATPAVPVGGCYRLIDIPMSNCINS GINKIFIMTQFNSASLN RHI    |
| MaAPL2a | LGGGAGTQLFPLTSTRATPAVPIGGCYRLIDIPMSNCINS GINKIFIMTQFNSASLN RHI   |
| MaAPL2b | LGGGAGTQLFPLTSTRATPAVPIGGCYRLIDIPMSNCINS GINKIFIMTQFNSASLN RHI   |
| MaAPL2c | LGGGAGTQLVPLTSTRATPAVPIGGCYRLIDIPMSNCINS GINKIFIMTQFNSASLN RHI   |
| MaAPL3  | LGGGPGAQLFPLTSTRATPAVPVGGCYKLIDIPMSNCINS GINKIFIMTQYNSASLN RHI   |
| MaAPS1  | LGGGAGTRL YPLTKRRAKPAVPLGANYRLIDIPVSNCLNSN ILKIYVLTQFNSASLN RHL  |
| MaAPS2  | CDDEPGTKLYPLTKRRSKSAIPVSAHYRIIDFVLG-----                         |
|         | * . * * * * * . * . * . * . * . * .                              |
| MaAPL1a | ARAYNFSNGVSFGDGFVEVLAATQTPGVEGKRWFQGTADAVRQFHWLFEDAKGKDIKDVL     |
| MaAPL1b | YRTFNFGNGINFGDGFVEVLAATQSPGESGMNWFQGTADAVRQFTWVFEDNRNKN I QYIL   |
| MaAPL2a | SRTYIFGNGINFGDGFVEVLAATQTPGEAGMNWFQGTADAVRQFTWVFEDNRNKN I EHV    |
| MaAPL2b | SRTYIFGNGINFGDGFVEVLAATQTPGEAGMNWFQGTADAVRQFTWVFEDNRNKN I EHV    |
| MaAPL2c | SRTYNFGNGINFGDGFVEVLAATQTPGEAGMNWFQGTADAVRQFTWVFEDNKNKN I EHI L  |
| MaAPL3  | YRTFNFGNGINFGDGFVEVLAATQSPGEAGMNWFQGTADAVRQFIWVFEDNRNKN I D YIM  |
| MaAPS1  | SRAYASNMGYQNEGFVEVLAAQQSPENP--NWFQGTADAVRQYLWL FEEHN--VMEYL      |
| MaAPS2  | -----KDGFEVLT TTYQSAEDLS--WFKGNADAVRRWLW LLEE HQ--VKDFL          |
|         | . * * * * * . * . * * . * * * * . * . * .                        |
| MaAPL1a | ILSGDHLYRMDYMDFVQDHRQSGADITISCM PMDDSRASDFGLMKIDNKGRVISFSEKPK    |
| MaAPL1b | ILSGDQLYRMDYMDFVQKHVDTGADITISCV PVGASRASDYGLIKIDKAGKIIQFSEKPK    |
| MaAPL2a | ILSGDQLYRMDYMDLVQKHIDTGADITVSCVPVGH SRASDYGLVKIDKTGRIFQFSEKPN    |
| MaAPL2b | ILSGDQLYRMDYMDLVQKHIDTGADITVSCVPVGH SRASDYGLVKIDKTGRIFQFSEKPN    |
| MaAPL2c | ILSGDQLYRMDYMDLVQKHVDTGADITVSCVPVGH SRASDYGLVKIDEAGRIIQFFEKPK    |
| MaAPL3  | ILSGDQLYRMDYMDFVQRHIDTGADITISCV PVSSSRASDYGIVKIDKAGHIIQFSEKPK    |
| MaAPS1  | ILAGDHLYRMDYEKFIQAHRETNADITVAALPMDEKRATAFGLMKIDEEGRIIEFAEKPK     |
| MaAPS2  | VLPGHHL YEMDYRKLIK AHRDNRADITIAMANNDRN YDASHDFLLHTSKNQFHGLMLAPA  |
|         | . * * . * * * * . . * * * * . . . . *                            |
| MaAPL1a | GEDLKAMEVDTSVLGLSKEEA AKNPYIASMGVYVFKKELLNLLRWRFPTANDFGSEIIP     |
| MaAPL1b | GGDLETMKDENTLFRLSHQDAKKYPYIASMGVYVFNRNTLLELLRW TYPKANDFGSDILP    |
| MaAPL2a | GAELEAMKDGGSFRLRSRQDAMKYPYIASMGVYVFKRDVLSKLLRWKYPKANDFGSEILP     |
| MaAPL2b | GAELEAMKDGGSFRLRSRQDAMKYPYIASMGVYVFKRDVLSKLLRWKYPKANDFGSEILP     |
| MaAPL2c | GADLEAMNDNGTFLRLSHQDAMKYPYIASMGVYVFKRDVLLKLLRWNYPKCNDFGSEILP     |
| MaAPL3  | GADLEAMKDENTFRLSHQDTIRYPYIASMGVYVFNRNTLLELLRW TYPKANDFGLDILP     |
| MaAPS1  | GDQLKAMKVDTTILGLDNERAKEMPFIASMG IYVISKDIMLQLLRDKFAGANDFGSEVIP    |
| MaAPS2  | S-----VHSPSAAVTTT TTKYPV SNAENMG IYVIRRDILIELLQEQLPKANDFGTEVLQ   |
|         | . * * . * * . . * * . * * . * * . * .                            |
| MaAPL1a | -ASAKEFFIKAYLFNDYWEDIGTIKSFFEANLALTA-----H                       |
| MaAPL1b | -SAVKDYNVQAYIFKDYWEDIQTIKSFYDANLALTD-----Q                       |

|         |                                                                                                      |
|---------|------------------------------------------------------------------------------------------------------|
| MaAPL2a | -SVVKEHNVQAYIFNDYWEDIGTIRSFFDANLALTEQVGISFRRTHANFMLKISSELFVQ                                         |
| MaAPL2b | -SVVKEHNVQAYIFNDYWEDIGTIRSFFDANLALTE-----Q                                                           |
| MaAPL2c | -SAVEEHNVQAYAFSDYWEDIGTIRSFFDANLALTE-----Q                                                           |
| MaAPL3  | -SAVKAYKAQAYIFEDYWDDIGTIKSFYDANLALTE-----Q                                                           |
| MaAPS1  | GATNVGMRVQAYLYDGYWEDIGTIEAFYNANLGITKK-----P                                                          |
| MaAPS2  | GAIALGMKVHAYMFDGHWNDLRNI EAFYQVNIESIT-----R                                                          |
|         | .        . ** .        * * .        . * .        * .                                                 |
| MaAPL1a | PPRFSFYDATKPTYTSRRNLPPSKVDNSKIVDSIVSHGTFMDNCLIEH SVIGIRSRIS SN                                       |
| MaAPL1b | PPKFQFYDPRTPIFTSPRFLPPNKIEQCRIRD AI I SHGCFLHECSIEH SVVGMR SRVYYG                                    |
| MaAPL2a | PPKFQFYDPMTPFFTS PRFLPPTKIEKCRIVDAI I SHGCFLRECSVERSIVGVR SRLDFD                                     |
| MaAPL2b | PPKFQFYDPMTPFFTS PRFLPPTKIEKCRIVDAI I SHGCFLRECSVERSIVGVR SRLDFD                                     |
| MaAPL2c | PPKFQFYDPMTPFFTS PRFLPPTKIEKCRVMDAI I SHGCFLRECSVERSIVGVR SRLDFG                                     |
| MaAPL3  | PPKFQFYDPRTPIFTSPRFLPPTKIEKCRILDSI I SHGCFLHECSIEH SVIGVR SRIDYG                                     |
| MaAPS1  | VPDFSFYDR TSPIYTQPRYLPPSKMLDADVTDSVIGEGCVIKNCKIHH SVIGLRSCISEG                                       |
| MaAPS2  | SMSTNFHGRHPAIYTLPNYLPPTTISNALIKDSI IGDGCLLNRC KISNSVIGTRTYVGDD                                       |
|         | *        . *        ***        .        .        * . . .        * .        * .        * . * * * .    |
| MaAPL1a | VHLKDTVMLGADYYETDAETAS -LLAEGRVPIGIGENTKIRNCIIDKNARIGKNV IISNS                                       |
| MaAPL1b | AELKHTLMMGADDYETEAEIAS -LLAEGKVP IGVGENTKIRNCIIDMNARIGKNV VIANR                                      |
| MaAPL2a | AELKDTMMMGADIYETEAEIAS -LLADDKVPIGVGQNTRIRNCIIDMNARIGKNV VIANK                                       |
| MaAPL2b | AELKDTMMMGADIYETEAEIAS -LLADDKVPIGVGQNTRIRNCIIDMNARIGKNV VIANK                                       |
| MaAPL2c | VELKDTMMMGADIYETEAEISS -HLADDKVPIGVGQKTKIRNCVIDMNARIGKNV VIANK                                       |
| MaAPL3  | AELKDALMLGADLYETEAEIAS -ILAEGKVP IGVGQNTKIRNCIIDMNARIGKNV VIANK                                      |
| MaAPS1  | AVLEDTLLMGADYYETDADRRL -LAAKGSVPMGIGRNSHVKRAIIDKNARIGENVKI INC                                       |
| MaAPS2  | AVIKKSVVMGSDIYEADVSWNTTKMQRSEIPVGIGEKAHVQNAIIDKNARIGKNV KIVNK                                        |
|         | .        . . . . * . * * * .        . * . * . *        . . . .        . * * * * * * * * * *          |
| MaAPL1a | DGIQEADRSAEGFYIRSGVTIILKNSTIGDGFVI                                                                   |
| MaAPL1b | DGVQEADRPSEGFYIRSGITTIILKSATVKDGTVI                                                                  |
| MaAPL2a | DGIQEADRPCEGFYIRSGITIIMKNSTIKDGTVI                                                                   |
| MaAPL2b | DGIQEADRPCEGFYIRSGITIIMKNSTIKDGTVI                                                                   |
| MaAPL2c | DGVQEADRASEGFYVRSGIVVILKNATIKDGTVI                                                                   |
| MaAPL3  | DGVQEADRPSEGFYIRFGITIIMKNATIKDGTVI                                                                   |
| MaAPS1  | DNVQEAAARETDGYFIKSGIVTVIKDALIPSGTVI                                                                  |
| MaAPS2  | DGVQECDREASGYIISGGIVVVLKNAVIPDDSIL                                                                   |
|         | * . . * * .        *        .        * .        .        * .        . . *        .        .        . |

**Figure S1.**
